# Supplementary material for: Spiers Memorial Lecture: From cold to hot, the structure and structural dynamics of dense ionic fluids
Source: Royal Society of Chemistry journal article supplement (doi:10.1039/d4fd00086b), 2024-01-01
Supplement: d4fd00086b1.pdf [file d4fd00086b1.pdf]

# Electronic Supplementary Information to: From Cold to Hot, The Structure and Structural Dynamics of Dense Ionic Fluids

Matthew S. Emerson,<sup>a</sup> Raphael Ogbodo,<sup>a</sup> Claudio J. Margulis<sup>\*a</sup>

<sup>a</sup> Department of Chemistry, University of Iowa, Iowa City, IA 52242

## 1 Simulation Methods

Simulation methods for sections other than 2.1 in the main article have been previously described and are appropriately referenced. For section 2.1 a description is provided below.

### 1.1 PIM Simulation Methods

PIM molecular dynamics simulations at constant temperature (900 °C) and pressure (1 bar) of  $\text{UCl}_3$ ,  $\text{UCl}_3\text{-KCl}$  (20-80 mol %), and  $\text{KCl}$  were run using the Metalwalls software (release 20.05)<sup>1</sup> using an identical protocol for equilibration and production as previously described for  $\text{LaCl}_3$  and its mixtures in reference 2. The number of ions used in this study are listed in Table 1; other parameters for the PIM model are provided in Tables 2 and 3. As proposed in reference 3, the polarizabilities of  $\text{K}^+$  and  $\text{Cl}^-$  are taken to be 4.7 bohr<sup>3</sup> and 20.0 bohr<sup>3</sup> respectively;  $\text{U}^{3+}$  is taken as non-polarizable.

**Table 1** Number of Ions Used in PIM Simulations

| Salt                              | Ion Type |      |      |
|-----------------------------------|----------|------|------|
|                                   | # U      | # K  | # Cl |
| $\text{UCl}_3$                    | 1000     | 0    | 3000 |
| $\text{UCl}_3\text{-KCl}$ (20-80) | 300      | 1200 | 2100 |
| $\text{KCl}$                      | 0        | 2000 | 2000 |

\* Email: claudio-margulis@uiowa.edu

**Table 2** Charge-Dipole Damping Parameters

| Ion-Pair      | $b_4^{ij}=b_4^{ji}$ | $c_4^{ij}$ | $c_4^{ji}$ | Ref.         |
|---------------|---------------------|------------|------------|--------------|
| $U^{3+}-Cl^-$ | 1.258               | 1.000      | N/A        | <sup>4</sup> |
| $K^+-Cl^-$    | 1.632               | 3.000      | 0.917      | <sup>3</sup> |

**Table 3** BMH Parameters

| Ion-Pair        | $\alpha_{ij}$ | $B_{ij}$ | $C_{ij}^6$ | $C_{ij}^8$ | $b_{ij}^6$ | $b_{ij}^8$ | Ref.         |
|-----------------|---------------|----------|------------|------------|------------|------------|--------------|
| $U^{3+}-U^{3+}$ | 3.000         | 15.0     | 47.70      | 100.0      | 1.50       | 1.00       | <sup>4</sup> |
| $U^{3+}-K^+$    | 3.000         | 10.0     | 34.80      | 94.6       | 1.50       | 1.00       | <sup>4</sup> |
| $K^+-K^+$       | 5.000         | 1.0      | 1.0        | 10.0       | 1.70       | 1.70       | <sup>3</sup> |
| $U^{3+}-Cl^-$   | 1.800         | 400.0    | 97.22      | 600.0      | 1.50       | 1.00       | <sup>4</sup> |
| $K^+-Cl^-$      | 1.833         | 208.6    | 29.40      | 128.3      | 1.70       | 1.70       | <sup>3</sup> |
| $Cl^- - Cl^-$   | 1.797         | 275.1    | 140.0      | 280.0      | 1.70       | 1.70       | <sup>3</sup> |

## References

- 1 A. Marin-Lafèche, M. Haefele, L. Scalfi, A. Coretti, T. Dufils, G. Jeanmairet, S. Reed, A. Serva, R. Berthin, C. Bacon, S. Bonella, B. Rotenberg, P. Madden and M. Salanne, *J. Open Source Softw.*, 2020, **5**, 2373.
- 2 M. S. Emerson, S. Sharma, S. Roy, V. S. Bryantsev, A. S. Ivanov, R. Gakhar, M. E. Woods, L. C. Gallington, S. Dai, D. S. Maltsev and C. J. Margulis, *J. Am. Chem. Soc.*, 2022, **144**, 21751–21762.
- 3 Y. Ishii, S. Kasai, M. Salanne and N. Ohtori, *Mol. Phys.*, 2015, **113**, 2442–2450.
- 4 M. Salanne, C. Simon, P. Turq and P. A. Madden, *J. Phys. Chem. B*, 2008, **112**, 1177–1183.
